# Supplementary material for: A simulation and thermodynamic improvement of the methanol production process with economic analysis: natural gas vapor reforming and utilization of carbon capture
Source: publisher site journal article supplement (doi:10.1515/cppm-2023-0011), 2023-07-18
Supplement: Supplementary file 1 [file j_cppm-2023-0011_suppl_001.docx]

**Supplementary file and material**

This supplementary file consists of the designed plant’s energy balance equations, operating condition and thermodynamic properties of the stream flows, and mass balance, which are represented in Tables S. 1-3, respectively.

Table S. 1. Energy balance equations for methanol production process equipment.

| Component | Energy balance equation |
| --- | --- |
| R-103 |  |
| R-101 |  |
| K-101 |  |
| K-100 |  |
| Burner |  |
| R-102 |  |
| VLV-100 |  |
| VLV-101 |  |
| E-106 |  |
| E-102 |  |
| E-100 |  |
| E-101 |  |
| E-103 |  |
| E-104 |  |
| E-105 |  |
| V-101 |  |
| V-100 |  |
| T-101 |  |
| T-102 |  |
| Process |  |
|  |  |

**Table S. 2.** Operating and thermodynamic conditions of methanol production process flows.

| Streams |  |  |  |  | Streams |  |  |  |
| --- | --- | --- | --- | --- | --- | --- | --- | --- |
| Nat Gas | 25 | 4200 | 2000 |  | water | 25 | 101.3 | 5322 |
| STM1 | 400 | 4200 | 2000 |  | STM2 | 400 | 2000 | 5322 |
| STM3 | 397.6 | 2000 | 7322 |  | STM6 | 600 | 2000 | 7583 |
| STM4 | 368.7 | 2000 | 7583 |  | STM7 | 920 | 2000 | 11280 |
| STM9 | 725.4 | 2000 | 11280 |  | STM10 | 629.1 | 2000 | 11280 |
| STM11 | 90.2 | 2000 | 11280 |  | STM12 | 45 | 2000 | 11280 |
| CWS | 35 | 500 | 70000 |  | CWR | 40.93 | 500 | 70000 |
| STM26 | 45 | 2000 | 580 |  | STM25 | 306.4 | 2000 | 580 |
| CO2 Captured | 45 | 180 | 580 |  | STM13 | 44.53 | 2000 | 9004 |
| STM14 | 44.53 | 2000 | 2859 |  | STM16 | 165.7 | 5000 | 9004 |
| STM17 | 235 | 5000 | 9004 |  | SM18 | 250 | 5000 | 3866 |
| STM20 | 221.2 | 5000 | 3866 |  | CWS4 | 35 | 500 | 4600 |
| LPS | 160.5 | 500 | 4600 |  | STM21 | 45 | 5000 | 3866 |
| CWS-2 | 35 | 500 | 366000 |  | CWR-2 | 40.22 | 500 | 366000 |
| Fuel Gas | 45 | 5000 | 161.2 |  | Crude MeOH | 45 | 5000 | 3705 |
| Fuel | 25 | 4200 | 788 |  | Air | 35 | 102 | 11440 |
| STM28 | 1798 | 102 | 12500 |  | STM29 | 702.2 | 102 | 12500 |
| STM30 | 198 | 102 | 12500 |  | Flue gas | 120.9 | 102 | 12500 |
| STM22 | 46.64 | 500 | 3705 |  | Purge | 63.87 | 500 | 50 |
| STM23 | 118.8 | 500 | 3655 |  | STM24 | 76.19 | 120 | 3655 |
| MeOH | 66.76 | 100 | 2560 |  | waste | 104.8 | 120 | 1095 |

Table S. 3. Ratio of components of methanol production process flows (simulation mass balance).

| Stream Name | | | | | | | | | |
| --- | --- | --- | --- | --- | --- | --- | --- | --- | --- |
|  | Nat Gas | STM3 | STM4 | STM7 | STM17 | SM18 | Flue gas | MeOH | Purge |
|  | Mole Fraction | | | | | | | | |
| Methane | 0.887 | 0.242 | 0.267 | 0.016 | 0.020 | 0.045 | 0.000 | 0.000 | 0.688 |
| N2 | 0.008 | 0.002 | 0.002 | 0.001 | 0.002 | 0.004 | 0.725 | 0.000 | 0.065 |
| O2 | 0.000 | 0.000 | 0.000 | 0.000 | 0.000 | 0.000 | 0.031 | 0.000 | 0.000 |
| CO | 0.000 | 0.000 | 0.000 | 0.135 | 0.169 | 0.000 | 0.001 | 0.000 | 0.000 |
| CO2 | 0.019 | 0.005 | 0.022 | 0.044 | 0.117 | 0.001 | 0.083 | 0.000 | 0.087 |
| H2 | 0.000 | 0.000 | 0.041 | 0.549 | 0.688 | 0.001 | 0.000 | 0.000 | 0.003 |
| CH4O | 0.000 | 0.000 | 0.000 | 0.000 | 0.000 | 0.664 | 0.000 | 1 | 0.135 |
| Ethane | 0.069 | 0.019 | 0.000 | 0.000 | 0.000 | 0.000 | 0.000 | 0.000 | 0.000 |
| Propane | 0.013 | 0.003 | 0.000 | 0.000 | 0.000 | 0.000 | 0.000 | 0.000 | 0.000 |
| Hexane | 0.000 | 0.000 | 0.000 | 0.000 | 0.000 | 0.000 | 0.000 | 0.000 | 0.000 |
| Pentane | 0.001 | 0.000 | 0.000 | 0.000 | 0.000 | 0.000 | 0.000 | 0.000 | 0.000 |
| Butane | 0.003 | 0.001 | 0.000 | 0.000 | 0.000 | 0.000 | 0.000 | 0.000 | 0.000 |
| H2O | 0.000 | 0.727 | 0.668 | 0.255 | 0.005 | 0.283 | 0.159 | 0.000 | 0.022 |
